# Supplementary material for: Experimental Evidence of a Diatropic Ring Current Occurring in the Metal Cluster [{(C5Me4H)2La}3Sn2Bi3]2–
Source: Research Square preprint supplement (doi:10.21203/rs.3.rs-3359612/v1), 2023-10-16

## checkCIF/PLATON report

Structure factors have been supplied for datablock(s) 1

THIS REPORT IS FOR GUIDANCE ONLY. IF USED AS PART OF A REVIEW PROCEDURE FOR PUBLICATION, IT SHOULD NOT REPLACE THE EXPERTISE OF AN EXPERIENCED CRYSTALLOGRAPHIC REFEREE.

No syntax errors found.      CIF dictionary      Interpreting this report

### Datablock: 1

---

Bond precision:      C-C = 0.0183 Å      Wavelength=0.71073

Cell:                      a=15.954 (4)                      b=28.0512 (19)                      c=26.982 (3)  
                                    alpha=90                      beta=90.462 (9)                      gamma=90

Temperature:              100 K

|                        | Calculated                                                               | Reported                                                                 |
|------------------------|--------------------------------------------------------------------------|--------------------------------------------------------------------------|
| Volume                 | 12075 (3)                                                                | 12074 (3)                                                                |
| Space group            | P 21/n                                                                   | P 1 21/n 1                                                               |
| Hall group             | -P 2yn                                                                   | -P 2yn                                                                   |
| Moiety formula         | 4 (C54 H78 Bi3 Ce3 Tl),<br>8 (C18 H36 K N2 O6), C9 H14,<br>0.5 (C6 H14), | C54 H78 Bi4 Ce3 Tl, 2 (C18<br>H36 K N2 O6), 0.25 (C9 H14),<br>0.25 (C3 H |
| Sum formula            | C372 H621 Bi16 Ce12 K8 N16<br>O48 Tl4 [+ solvent]                        | C93 H155.25 Bi4 Ce3 K2 N4<br>O12 Tl                                      |
| Mr                     | 12241.31                                                                 | 3060.30                                                                  |
| Dx, g cm <sup>-3</sup> | 1.683                                                                    | 1.683                                                                    |
| Z                      | 1                                                                        | 4                                                                        |
| Mu (mm <sup>-1</sup> ) | 8.359                                                                    | 8.359                                                                    |
| F000                   | 5849.0                                                                   | 5849.0                                                                   |
| F000'                  | 5775.64                                                                  |                                                                          |
| h, k, lmax             | 18, 33, 32                                                               | 18, 33, 32                                                               |
| Nref                   | 21258                                                                    | 21239                                                                    |
| Tmin, Tmax             | 0.009, 0.081                                                             | 0.561, 0.746                                                             |
| Tmin'                  | 0.005                                                                    |                                                                          |

Correction method= # Reported T Limits: Tmin=0.561 Tmax=0.746  
AbsCorr = MULTII-SCAN

Data completeness= 0.999

Theta (max)= 25.000

R(reflections)= 0.0567( 15425)

wR2(reflections)=  
0.1235( 21239)

S = 1.062

Npar= 1139

---

The following ALERTS were generated. Each ALERT has the format

**test-name\_ALERT\_alert-type\_alert-level.**

Click on the hyperlinks for more details of the test.

---

### Alert level A

PLAT307\_ALERT\_2\_A Isolated Metal Atom found in Structure (Unusual)

Bi4A Check

**Author Response: This is an error of the software, which does not consider the (normal) Bi-Atom bond lengths as bonds. All Bi atoms are properly connected to other atoms.**

PLAT307\_ALERT\_2\_A Isolated Metal Atom found in Structure (Unusual)

Bi4B Check

**Author Response: This is an error of the software, which does not consider the (normal) Bi-Atom bond lengths as bonds. All Bi atoms are properly connected to other atoms.**

---

### Alert level B

PLAT910\_ALERT\_3\_B Missing # of FCF Reflection(s) Below Theta(Min).

11 Note

**Author Response: This is due to the geometry of our measurement device, but does not affect the validation of the data and the correctness of the refinement result.**

---

### Alert level C

RINTA01\_ALERT\_3\_C The value of Rint is greater than 0.12

Rint given 0.146

|                                                                   |                             |              |
|-------------------------------------------------------------------|-----------------------------|--------------|
| PLAT213_ALERT_2_C Atom C48                                        | has ADP max/min Ratio ..... | 3.1 prolat   |
| PLAT220_ALERT_2_C NonSolvent Resd 1 C                             | Ueq(max)/Ueq(min) Range     | 3.1 Ratio    |
| PLAT234_ALERT_4_C Large Hirshfeld Difference C24                  | --C25 .                     | 0.16 Ang.    |
| PLAT234_ALERT_4_C Large Hirshfeld Difference C37                  | --C44 .                     | 0.16 Ang.    |
| PLAT234_ALERT_4_C Large Hirshfeld Difference O1                   | --C56 .                     | 0.17 Ang.    |
| PLAT234_ALERT_4_C Large Hirshfeld Difference O1                   | --C57 .                     | 0.20 Ang.    |
| PLAT234_ALERT_4_C Large Hirshfeld Difference C73                  | --C74 .                     | 0.20 Ang.    |
| PLAT241_ALERT_2_C High 'MainMol' Ueq as Compared to Neighbors of  |                             | C57 Check    |
| PLAT242_ALERT_2_C Low 'MainMol' Ueq as Compared to Neighbors of   |                             | K2 Check     |
| PLAT342_ALERT_3_C Low Bond Precision on C-C Bonds .....           |                             | 0.01828 Ang. |
| PLAT906_ALERT_3_C Large K Value in the Analysis of Variance ..... |                             | 4.834 Check  |
| PLAT911_ALERT_3_C Missing FCF Refl Between Thmin & STh/L=         | 0.595                       | 6 Report     |
| PLAT971_ALERT_2_C Check Calcd Resid. Dens.                        | 1.01Ang From Bi4B           | 1.73 eA-3    |

|                   |                                           |   |            |
|-------------------|-------------------------------------------|---|------------|
| PLAT977_ALERT_2_C | Check Negative Difference Density on H1   | . | -0.53 eA-3 |
| PLAT977_ALERT_2_C | Check Negative Difference Density on H9C  | . | -0.36 eA-3 |
| PLAT977_ALERT_2_C | Check Negative Difference Density on H12B | . | -0.33 eA-3 |
| PLAT977_ALERT_2_C | Check Negative Difference Density on H19  | . | -0.36 eA-3 |
| PLAT977_ALERT_2_C | Check Negative Difference Density on H21C | . | -0.31 eA-3 |
| PLAT977_ALERT_2_C | Check Negative Difference Density on H23A | . | -0.31 eA-3 |
| PLAT977_ALERT_2_C | Check Negative Difference Density on H50A | . | -0.36 eA-3 |
| PLAT977_ALERT_2_C | Check Negative Difference Density on H56A | . | -0.31 eA-3 |
| PLAT977_ALERT_2_C | Check Negative Difference Density on H58B | . | -0.40 eA-3 |
| PLAT977_ALERT_2_C | Check Negative Difference Density on H62B | . | -0.32 eA-3 |
| PLAT977_ALERT_2_C | Check Negative Difference Density on H65A | . | -0.32 eA-3 |
| PLAT977_ALERT_2_C | Check Negative Difference Density on H81A | . | -0.37 eA-3 |
| PLAT977_ALERT_2_C | Check Negative Difference Density on H84A | . | -0.36 eA-3 |
| PLAT977_ALERT_2_C | Check Negative Difference Density on H89B | . | -0.34 eA-3 |

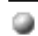

### Alert level G

|                   |                                                  |                |              |
|-------------------|--------------------------------------------------|----------------|--------------|
| PLAT003_ALERT_2_G | Number of Uiso or Uij Restrained non-H Atoms ... | 3              | Report       |
| PLAT020_ALERT_3_G | The Value of Rint is Greater Than 0.12 .....     | 0.146          | Report       |
| PLAT042_ALERT_1_G | Calc. and Reported MoietyFormula Strings Differ  |                | Please Check |
| PLAT045_ALERT_1_G | Calculated and Reported Z Differ by a Factor ... | 0.250          | Check        |
| PLAT083_ALERT_2_G | SHELXL Second Parameter in WGHT Unusually Large  | 109.07         | Why ?        |
| PLAT186_ALERT_4_G | The CIF-Embedded .res File Contains ISOR Records | 1              | Report       |
| PLAT300_ALERT_4_G | Atom Site Occupancy of Tl1A                      | Constrained at | 0.5 Check    |
| PLAT300_ALERT_4_G | Atom Site Occupancy of Tl1B                      | Constrained at | 0.5 Check    |
| PLAT300_ALERT_4_G | Atom Site Occupancy of C91                       | Constrained at | 0.25 Check   |
| PLAT300_ALERT_4_G | Atom Site Occupancy of C92                       | Constrained at | 0.25 Check   |
| PLAT300_ALERT_4_G | Atom Site Occupancy of C93                       | Constrained at | 0.25 Check   |
| PLAT300_ALERT_4_G | Atom Site Occupancy of C94                       | Constrained at | 0.25 Check   |
| PLAT300_ALERT_4_G | Atom Site Occupancy of C95                       | Constrained at | 0.25 Check   |
| PLAT300_ALERT_4_G | Atom Site Occupancy of C96                       | Constrained at | 0.25 Check   |
| PLAT300_ALERT_4_G | Atom Site Occupancy of C97                       | Constrained at | 0.25 Check   |
| PLAT300_ALERT_4_G | Atom Site Occupancy of C98                       | Constrained at | 0.25 Check   |
| PLAT300_ALERT_4_G | Atom Site Occupancy of C99                       | Constrained at | 0.25 Check   |
| PLAT300_ALERT_4_G | Atom Site Occupancy of H91A                      | Constrained at | 0.25 Check   |
| PLAT300_ALERT_4_G | Atom Site Occupancy of H91B                      | Constrained at | 0.25 Check   |
| PLAT300_ALERT_4_G | Atom Site Occupancy of H93A                      | Constrained at | 0.25 Check   |
| PLAT300_ALERT_4_G | Atom Site Occupancy of H93B                      | Constrained at | 0.25 Check   |
| PLAT300_ALERT_4_G | Atom Site Occupancy of H93C                      | Constrained at | 0.25 Check   |
| PLAT300_ALERT_4_G | Atom Site Occupancy of H95A                      | Constrained at | 0.25 Check   |
| PLAT300_ALERT_4_G | Atom Site Occupancy of H95B                      | Constrained at | 0.25 Check   |
| PLAT300_ALERT_4_G | Atom Site Occupancy of H95C                      | Constrained at | 0.25 Check   |
| PLAT300_ALERT_4_G | Atom Site Occupancy of H97A                      | Constrained at | 0.25 Check   |
| PLAT300_ALERT_4_G | Atom Site Occupancy of H97B                      | Constrained at | 0.25 Check   |
| PLAT300_ALERT_4_G | Atom Site Occupancy of H97C                      | Constrained at | 0.25 Check   |
| PLAT300_ALERT_4_G | Atom Site Occupancy of H99A                      | Constrained at | 0.25 Check   |
| PLAT300_ALERT_4_G | Atom Site Occupancy of H99B                      | Constrained at | 0.25 Check   |
| PLAT300_ALERT_4_G | Atom Site Occupancy of H99C                      | Constrained at | 0.25 Check   |
| PLAT300_ALERT_4_G | Atom Site Occupancy of C100                      | Constrained at | 0.25 Check   |
| PLAT300_ALERT_4_G | Atom Site Occupancy of C101                      | Constrained at | 0.25 Check   |
| PLAT300_ALERT_4_G | Atom Site Occupancy of C103                      | Constrained at | 0.25 Check   |
| PLAT300_ALERT_4_G | Atom Site Occupancy of H10A                      | Constrained at | 0.25 Check   |
| PLAT300_ALERT_4_G | Atom Site Occupancy of H10B                      | Constrained at | 0.25 Check   |
| PLAT300_ALERT_4_G | Atom Site Occupancy of H10C                      | Constrained at | 0.25 Check   |
| PLAT300_ALERT_4_G | Atom Site Occupancy of H10D                      | Constrained at | 0.25 Check   |
| PLAT300_ALERT_4_G | Atom Site Occupancy of H10E                      | Constrained at | 0.25 Check   |
| PLAT300_ALERT_4_G | Atom Site Occupancy of H10F                      | Constrained at | 0.25 Check   |

|                   |                                                  |                |             |        |
|-------------------|--------------------------------------------------|----------------|-------------|--------|
| PLAT300_ALERT_4_G | Atom Site Occupancy of H10G                      | Constrained at | 0.25        | Check  |
| PLAT300_ALERT_4_G | Atom Site Occupancy of Bi4A                      | Constrained at | 0.5         | Check  |
| PLAT300_ALERT_4_G | Atom Site Occupancy of Bi4B                      | Constrained at | 0.5         | Check  |
| PLAT301_ALERT_3_G | Main Residue Disorder .....(Resd 1 )             |                | 2%          | Note   |
| PLAT302_ALERT_4_G | Anion/Solvent/Minor-Residue Disorder (Resd 4 )   |                | 100%        | Note   |
| PLAT302_ALERT_4_G | Anion/Solvent/Minor-Residue Disorder (Resd 5 )   |                | 100%        | Note   |
| PLAT302_ALERT_4_G | Anion/Solvent/Minor-Residue Disorder (Resd 6 )   |                | 100%        | Note   |
| PLAT302_ALERT_4_G | Anion/Solvent/Minor-Residue Disorder (Resd 7 )   |                | 100%        | Note   |
| PLAT304_ALERT_4_G | Non-Integer Number of Atoms in ..... (Resd 4 )   |                | 5.75        | Check  |
| PLAT304_ALERT_4_G | Non-Integer Number of Atoms in ..... (Resd 6 )   |                | 0.50        | Check  |
| PLAT304_ALERT_4_G | Non-Integer Number of Atoms in ..... (Resd 7 )   |                | 0.50        | Check  |
| PLAT380_ALERT_4_G | Incorrectly? Oriented X(sp2)-Methyl Moiety ..... |                | C9          | Check  |
| PLAT380_ALERT_4_G | Incorrectly? Oriented X(sp2)-Methyl Moiety ..... |                | C39         | Check  |
| PLAT606_ALERT_4_G | Solvent Accessible VOID(S) in Structure .....    |                | !           | Info   |
| PLAT722_ALERT_1_G | Angle Calc 111.00, Rep 109.50 Dev...             |                | 1.50        | Degree |
|                   | C98 -C99 -H99C 1_555 1_555 1_555 #               | 974            |             | Check  |
| PLAT722_ALERT_1_G | Angle Calc 108.00, Rep 109.50 Dev...             |                | 1.50        | Degree |
|                   | H99A -C99 -H99B 1_555 1_555 1_555 #              | 975            |             | Check  |
| PLAT789_ALERT_4_G | Atoms with Negative _atom_site_disorder_group #  |                | 2           | Check  |
| PLAT790_ALERT_4_G | Centre of Gravity not Within Unit Cell: Resd. #  |                | 2           | Note   |
|                   | C18 H36 K N2 O6                                  |                |             |        |
| PLAT822_ALERT_4_G | CIF-embedded .res Contains Negative PART Numbers |                | 2           | Check  |
| PLAT860_ALERT_3_G | Number of Least-Squares Restraints .....         |                | 18          | Note   |
| PLAT868_ALERT_4_G | ALERTS Due to the Use of _smtbx_masks Suppressed |                | !           | Info   |
| PLAT883_ALERT_1_G | No Info/Value for _atom_sites_solution_primary . |                | Please Do ! |        |
| PLAT909_ALERT_3_G | Percentage of I>2sig(I) Data at Theta(Max) Still |                | 52%         | Note   |
| PLAT913_ALERT_3_G | Missing # of Very Strong Reflections in FCF .... |                | 1           | Note   |
| PLAT933_ALERT_2_G | Number of HKL-OMIT Records in Embedded .res File |                | 4           | Note   |
| PLAT961_ALERT_5_G | Dataset Contains no Negative Intensities .....   |                | Please      | Check  |
| PLAT967_ALERT_5_G | Note: Two-Theta Cutoff Value in Embedded .res .. |                | 50.0        | Degree |
| PLAT978_ALERT_2_G | Number C-C Bonds with Positive Residual Density. |                | 0           | Info   |

- 
- 2 **ALERT level A** = Most likely a serious problem - resolve or explain  
 1 **ALERT level B** = A potentially serious problem, consider carefully  
 28 **ALERT level C** = Check. Ensure it is not caused by an omission or oversight  
 68 **ALERT level G** = General information/check it is not something unexpected
- 5 ALERT type 1 CIF construction/syntax error, inconsistent or missing data  
 25 ALERT type 2 Indicator that the structure model may be wrong or deficient  
 10 ALERT type 3 Indicator that the structure quality may be low  
 57 ALERT type 4 Improvement, methodology, query or suggestion  
 2 ALERT type 5 Informative message, check
-

It is advisable to attempt to resolve as many as possible of the alerts in all categories. Often the minor alerts point to easily fixed oversights, errors and omissions in your CIF or refinement strategy, so attention to these fine details can be worthwhile. In order to resolve some of the more serious problems it may be necessary to carry out additional measurements or structure refinements. However, the purpose of your study may justify the reported deviations and the more serious of these should normally be commented upon in the discussion or experimental section of a paper or in the "special\_details" fields of the CIF. checkCIF was carefully designed to identify outliers and unusual parameters, but every test has its limitations and alerts that are not important in a particular case may appear. Conversely, the absence of alerts does not guarantee there are no aspects of the results needing attention. It is up to the individual to critically assess their own results and, if necessary, seek expert advice.

### **Publication of your CIF in IUCr journals**

A basic structural check has been run on your CIF. These basic checks will be run on all CIFs submitted for publication in IUCr journals (*Acta Crystallographica*, *Journal of Applied Crystallography*, *Journal of Synchrotron Radiation*); however, if you intend to submit to *Acta Crystallographica Section C* or *E* or *IUCrData*, you should make sure that full publication checks are run on the final version of your CIF prior to submission.

### **Publication of your CIF in other journals**

Please refer to the *Notes for Authors* of the relevant journal for any special instructions relating to CIF submission.

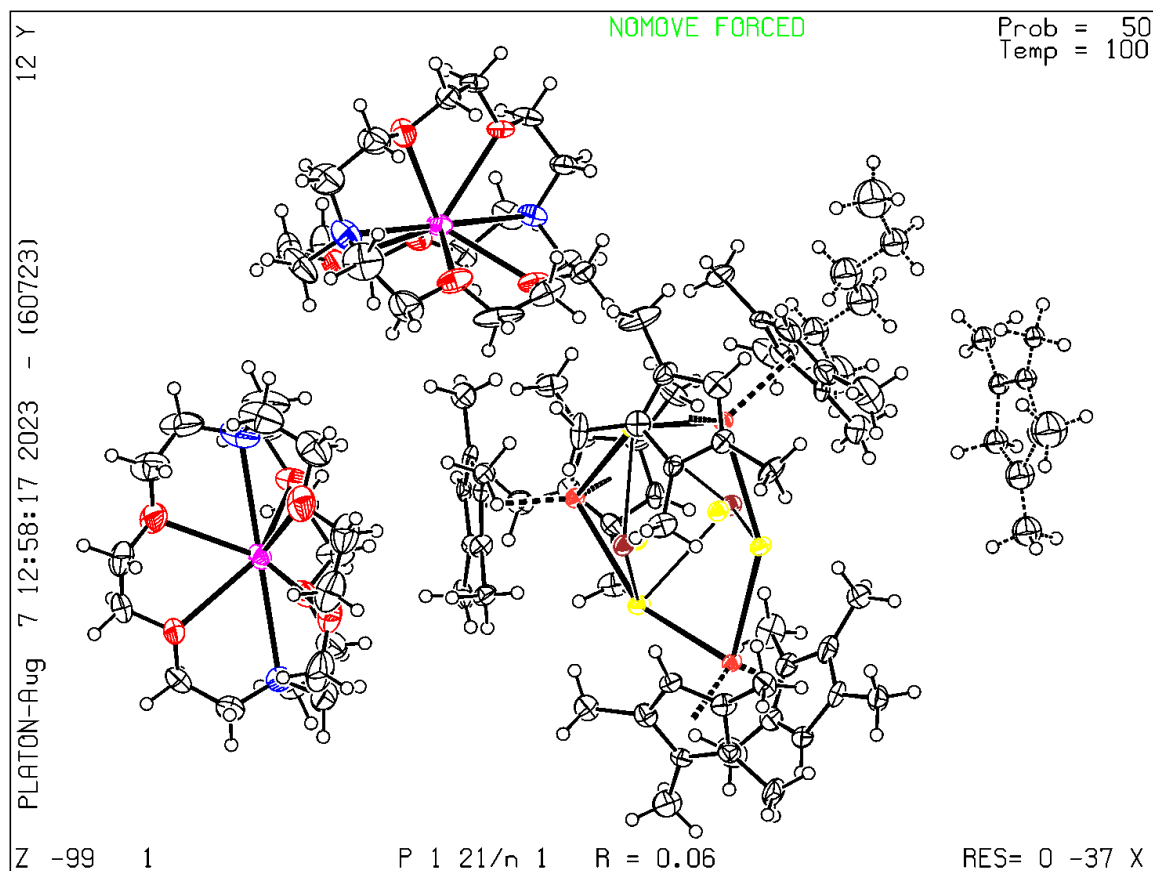

Supplement: Supplementary file 1 [file ddc678b9ee6e9c06de659611.pdf]
