# Supplementary material for: Experimental Evidence of a Diatropic Ring Current Occurring in the Metal Cluster [{(C5Me4H)2La}3Sn2Bi3]2–
Source: Research Square preprint supplement (doi:10.21203/rs.3.rs-3359612/v1), 2023-10-16

## checkCIF/PLATON report

Structure factors have been supplied for datablock(s) 1\_sphaerisch

THIS REPORT IS FOR GUIDANCE ONLY. IF USED AS PART OF A REVIEW PROCEDURE FOR PUBLICATION, IT SHOULD NOT REPLACE THE EXPERTISE OF AN EXPERIENCED CRYSTALLOGRAPHIC REFEREE.

No syntax errors found.      CIF dictionary      Interpreting this report

### Datablock: 1\_sphaerisch

---

Bond precision:    C-C = 0.0132 Å                      Wavelength=0.71073

Cell:                      a=15.9933(7)              b=28.0507(12)              c=27.0409(11)  
                            alpha=90              beta=90.246(3)              gamma=90

Temperature:            100 K

|                | Calculated                                                      | Reported                                              |
|----------------|-----------------------------------------------------------------|-------------------------------------------------------|
| Volume         | 12131.1(9)                                                      | 12131.1(9)                                            |
| Space group    | P 21/n                                                          | P 1 21/n 1                                            |
| Hall group     | -P 2yn                                                          | -P 2yn                                                |
| Moiety formula | C54 H78 Bi3 La3 Sn2, 2(C18 H36 K N2 O6), 0.667(C7 H8) [+ solven | C54 H78 Bi3 La3 Sn2, 2(C18 H36 K N2 O6), 0.667(C7 H8) |
| Sum formula    | C94.67 H155.33 Bi3 K2 La3 N4 O12 Sn2 [+ solvent]                | C94.67 H155.33 Bi3 K2 La3 N4 O12 Sn2                  |
| Mr             | 2900.85                                                         | 2900.81                                               |
| Dx, g cm-3     | 1.588                                                           | 1.588                                                 |
| Z              | 4                                                               | 4                                                     |
| Mu (mm-1)      | 5.888                                                           | 5.888                                                 |
| F000           | 5621.3                                                          | 5621.0                                                |
| F000'          | 5568.10                                                         |                                                       |
| h, k, lmax     | 20, 35, 34                                                      | 20, 35, 34                                            |
| Nref           | 25911                                                           | 25636                                                 |
| Tmin, Tmax     | 0.932, 0.943                                                    | 0.006, 0.010                                          |
| Tmin'          | 0.029                                                           |                                                       |

Correction method= # Reported T Limits: Tmin=0.006 Tmax=0.010  
AbsCorr = MULTII-SCAN

Data completeness= 0.989

Theta(max)= 26.788

R(reflections)= 0.0454( 14660)

wR2(reflections)=  
0.1097( 25636)

S = 0.900

Npar= 1196

The following ALERTS were generated. Each ALERT has the format

**test-name\_ALERT\_alert-type\_alert-level.**

Click on the hyperlinks for more details of the test.

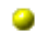

### Alert level C

|                   |                                                  |                                   |         |        |
|-------------------|--------------------------------------------------|-----------------------------------|---------|--------|
| PLAT214_ALERT_2_C | Atom C1_1                                        | (Anion/Solvent) ADP max/min Ratio | 4.8     | prolat |
| PLAT234_ALERT_4_C | Large Hirshfeld Difference C55                   | --C56                             | 0.23    | Ang.   |
| PLAT234_ALERT_4_C | Large Hirshfeld Difference C67                   | --C68                             | 0.17    | Ang.   |
| PLAT234_ALERT_4_C | Large Hirshfeld Difference N3                    | --C79                             | 0.17    | Ang.   |
| PLAT241_ALERT_2_C | High 'MainMol' Ueq as Compared to Neighbors of   |                                   | C61     | Check  |
| PLAT241_ALERT_2_C | High 'MainMol' Ueq as Compared to Neighbors of   |                                   | C85     | Check  |
| PLAT250_ALERT_2_C | Large U3/U1 Ratio for Average U(i,j) Tensor .... |                                   | 3.4     | Note   |
| PLAT342_ALERT_3_C | Low Bond Precision on C-C Bonds .....            |                                   | 0.01315 | Ang.   |
| PLAT911_ALERT_3_C | Missing FCF Refl Between Thmin & STh/L=          | 0.600                             | 25      | Report |
| PLAT977_ALERT_2_C | Check Negative Difference Density on H44C        |                                   | -0.31   | eA-3   |
| PLAT977_ALERT_2_C | Check Negative Difference Density on H82B        |                                   | -0.32   | eA-3   |

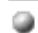

### Alert level G

|                   |                                                  |                |        |        |
|-------------------|--------------------------------------------------|----------------|--------|--------|
| PLAT002_ALERT_2_G | Number of Distance or Angle Restraints on AtSite |                | 14     | Note   |
| PLAT003_ALERT_2_G | Number of Uiso or Uij Restrained non-H Atoms ... |                | 9      | Report |
| PLAT172_ALERT_4_G | The CIF-Embedded .res File Contains DFIX Records |                | 6      | Report |
| PLAT173_ALERT_4_G | The CIF-Embedded .res File Contains DANG Records |                | 10     | Report |
| PLAT174_ALERT_4_G | The CIF-Embedded .res File Contains FLAT Records |                | 1      | Report |
| PLAT176_ALERT_4_G | The CIF-Embedded .res File Contains SADI Records |                | 4      | Report |
| PLAT178_ALERT_4_G | The CIF-Embedded .res File Contains SIMU Records |                | 1      | Report |
| PLAT186_ALERT_4_G | The CIF-Embedded .res File Contains ISOR Records |                | 2      | Report |
| PLAT187_ALERT_4_G | The CIF-Embedded .res File Contains RIGU Records |                | 2      | Report |
| PLAT300_ALERT_4_G | Atom Site Occupancy of C1_1                      | Constrained at | 0.3333 | Check  |
| PLAT300_ALERT_4_G | Atom Site Occupancy of C5_1                      | Constrained at | 0.3333 | Check  |
| PLAT300_ALERT_4_G | Atom Site Occupancy of C7_1                      | Constrained at | 0.3333 | Check  |
| PLAT300_ALERT_4_G | Atom Site Occupancy of C2_1                      | Constrained at | 0.3333 | Check  |
| PLAT300_ALERT_4_G | Atom Site Occupancy of C6_1                      | Constrained at | 0.3333 | Check  |
| PLAT300_ALERT_4_G | Atom Site Occupancy of C3_1                      | Constrained at | 0.3333 | Check  |
| PLAT300_ALERT_4_G | Atom Site Occupancy of C4_1                      | Constrained at | 0.3333 | Check  |
| PLAT300_ALERT_4_G | Atom Site Occupancy of H1A_1                     | Constrained at | 0.3333 | Check  |
| PLAT300_ALERT_4_G | Atom Site Occupancy of H1B_1                     | Constrained at | 0.3333 | Check  |
| PLAT300_ALERT_4_G | Atom Site Occupancy of H1C_1                     | Constrained at | 0.3333 | Check  |
| PLAT300_ALERT_4_G | Atom Site Occupancy of H5_1                      | Constrained at | 0.3333 | Check  |
| PLAT300_ALERT_4_G | Atom Site Occupancy of H7_1                      | Constrained at | 0.3333 | Check  |
| PLAT300_ALERT_4_G | Atom Site Occupancy of H6_1                      | Constrained at | 0.3333 | Check  |
| PLAT300_ALERT_4_G | Atom Site Occupancy of H3_1                      | Constrained at | 0.3333 | Check  |
| PLAT300_ALERT_4_G | Atom Site Occupancy of H4_1                      | Constrained at | 0.3333 | Check  |
| PLAT300_ALERT_4_G | Atom Site Occupancy of C1_2                      | Constrained at | 0.3333 | Check  |
| PLAT300_ALERT_4_G | Atom Site Occupancy of C5_2                      | Constrained at | 0.3333 | Check  |
| PLAT300_ALERT_4_G | Atom Site Occupancy of C7_2                      | Constrained at | 0.3333 | Check  |
| PLAT300_ALERT_4_G | Atom Site Occupancy of C2_2                      | Constrained at | 0.3333 | Check  |
| PLAT300_ALERT_4_G | Atom Site Occupancy of C6_2                      | Constrained at | 0.3333 | Check  |
| PLAT300_ALERT_4_G | Atom Site Occupancy of C3_2                      | Constrained at | 0.3333 | Check  |
| PLAT300_ALERT_4_G | Atom Site Occupancy of C4_2                      | Constrained at | 0.3333 | Check  |

|                   |                                                  |                |        |        |
|-------------------|--------------------------------------------------|----------------|--------|--------|
| PLAT300_ALERT_4_G | Atom Site Occupancy of H1A_2                     | Constrained at | 0.3333 | Check  |
| PLAT300_ALERT_4_G | Atom Site Occupancy of H1B_2                     | Constrained at | 0.3333 | Check  |
| PLAT300_ALERT_4_G | Atom Site Occupancy of H1C_2                     | Constrained at | 0.3333 | Check  |
| PLAT300_ALERT_4_G | Atom Site Occupancy of H5_2                      | Constrained at | 0.3333 | Check  |
| PLAT300_ALERT_4_G | Atom Site Occupancy of H7_2                      | Constrained at | 0.3333 | Check  |
| PLAT300_ALERT_4_G | Atom Site Occupancy of H6_2                      | Constrained at | 0.3333 | Check  |
| PLAT300_ALERT_4_G | Atom Site Occupancy of H3_2                      | Constrained at | 0.3333 | Check  |
| PLAT300_ALERT_4_G | Atom Site Occupancy of H4_2                      | Constrained at | 0.3333 | Check  |
| PLAT302_ALERT_4_G | Anion/Solvent/Minor-Residue Disorder (Resd 4 )   |                | 100%   | Note   |
| PLAT302_ALERT_4_G | Anion/Solvent/Minor-Residue Disorder (Resd 5 )   |                | 100%   | Note   |
| PLAT606_ALERT_4_G | Solvent Accessible VOID(S) in Structure .....    |                |        | ! Info |
| PLAT720_ALERT_4_G | Number of Unusual/Non-Standard Labels .....      |                | 30     | Note   |
| PLAT860_ALERT_3_G | Number of Least-Squares Restraints .....         |                | 319    | Note   |
| PLAT868_ALERT_4_G | ALERTS Due to the Use of _smtbx_masks Suppressed |                |        | ! Info |
| PLAT910_ALERT_3_G | Missing # of FCF Reflection(s) Below Theta(Min). |                | 1      | Note   |
| PLAT912_ALERT_4_G | Missing # of FCF Reflections Above STh/L= 0.600  |                | 249    | Note   |
| PLAT933_ALERT_2_G | Number of HKL-OMIT Records in Embedded .res File |                | 25     | Note   |
| PLAT978_ALERT_2_G | Number C-C Bonds with Positive Residual Density. |                | 0      | Info   |

---

0 **ALERT level A** = Most likely a serious problem - resolve or explain  
 0 **ALERT level B** = A potentially serious problem, consider carefully  
 11 **ALERT level C** = Check. Ensure it is not caused by an omission or oversight  
 49 **ALERT level G** = General information/check it is not something unexpected

0 ALERT type 1 CIF construction/syntax error, inconsistent or missing data  
 10 ALERT type 2 Indicator that the structure model may be wrong or deficient  
 4 ALERT type 3 Indicator that the structure quality may be low  
 46 ALERT type 4 Improvement, methodology, query or suggestion  
 0 ALERT type 5 Informative message, check

---

It is advisable to attempt to resolve as many as possible of the alerts in all categories. Often the minor alerts point to easily fixed oversights, errors and omissions in your CIF or refinement strategy, so attention to these fine details can be worthwhile. In order to resolve some of the more serious problems it may be necessary to carry out additional measurements or structure refinements. However, the purpose of your study may justify the reported deviations and the more serious of these should normally be commented upon in the discussion or experimental section of a paper or in the "special\_details" fields of the CIF. checkCIF was carefully designed to identify outliers and unusual parameters, but every test has its limitations and alerts that are not important in a particular case may appear. Conversely, the absence of alerts does not guarantee there are no aspects of the results needing attention. It is up to the individual to critically assess their own results and, if necessary, seek expert advice.

### **Publication of your CIF in IUCr journals**

A basic structural check has been run on your CIF. These basic checks will be run on all CIFs submitted for publication in IUCr journals (*Acta Crystallographica*, *Journal of Applied Crystallography*, *Journal of Synchrotron Radiation*); however, if you intend to submit to *Acta Crystallographica Section C* or *E* or *IUCrData*, you should make sure that full publication checks are run on the final version of your CIF prior to submission.

### **Publication of your CIF in other journals**

Please refer to the *Notes for Authors* of the relevant journal for any special instructions relating to CIF submission.

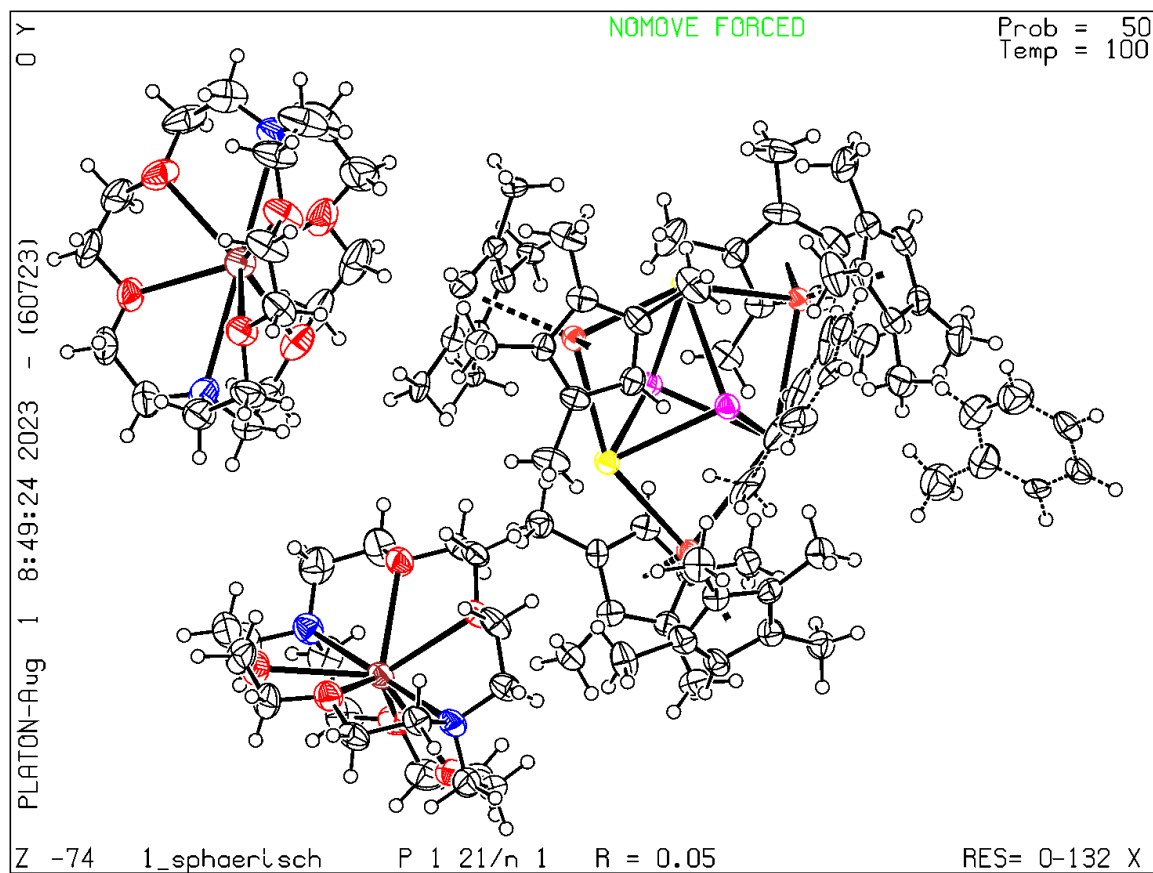

Supplement: Supplementary file 3 [file ed0b75a3c06badb51d38b82d.pdf]
